# Supplementary material for: Recent Climatology (1991–2020) and Trends in Local Warm and Cold Season Extreme Temperature Days and Nights in Arabia
Source: MDPI journal article supplement (doi:10.3390/ijerph19052506), 2022-02-22
Supplement: s1 [file s1]

## Supplementary material

**Table S1.** Weather stations with World Meteorological Organization (WMO) ID, latitude, longitude, and elevation. Stations are ordered from high to low elevation.

| No. | WMO ID | Lon (°E) | Lat (°N) | Elevation (m) | Name                          |
|-----|--------|----------|----------|---------------|-------------------------------|
| 1   | 41112  | 42.657   | 18.24    | 2090.3        | ABHA                          |
| 2   | 41114  | 42.804   | 18.297   | 2065.9        | KING KHALED AB                |
| 3   | 41055  | 41.634   | 20.296   | 1672.1        | AL BAHA                       |
| 4   | 41036  | 40.544   | 21.483   | 1477.7        | TAIF                          |
| 5   | 41128  | 44.419   | 17.611   | 1213.7        | NEJРАН                        |
| 6   | 41084  | 42.621   | 19.984   | 1184.8        | BISHA                         |
| 7   | 40394  | 41.686   | 27.438   | 1015.3        | HAIL                          |
| 8   | 40356  | 38.731   | 31.693   | 854.4         | TURAIIF                       |
| 9   | 40375  | 36.619   | 28.365   | 777.5         | TABUK                         |
| 10  | 41136  | 47.121   | 17.467   | 720.2         | SHARURAH                      |
| 11  | 40430  | 39.705   | 24.553   | 655.6         | PRINCE MOHAMMAD BIN ABDULAZIZ |
| 12  | 40405  | 43.767   | 26.3     | 648           | GASSIM                        |
| 13  | 40357  | 41.138   | 30.907   | 552.6         | ARAR                          |
| 14  | 40360  | 37.279   | 31.412   | 509.6         | GURIAT                        |
| 15  | 41314  | 54.025   | 17.666   | 478.5         | THUMRAIT                      |
| 16  | 40362  | 43.491   | 29.626   | 449.3         | RAFHA                         |
| 17  | 40373  | 46.125   | 28.335   | 357.8         | QAISUMAH                      |
| 18  | 40420  | 49.485   | 25.285   | 179.2         | AL AHSA                       |
| 19  | 40582  | 47.969   | 29.227   | 62.8          | KUWAIT INTL                   |
| 20  | 41198  | 56.324   | 25.112   | 46.3          | FUJAIRAH INTL                 |
| 21  | 41217  | 54.651   | 24.433   | 26.8          | ABU DHABI INTL                |
| 22  | 40416  | 50.152   | 26.265   | 25.6          | KING ABDULAZIZ AB             |
| 23  | 41316  | 54.091   | 17.039   | 22.3          | SALALAH                       |
| 24  | 40400  | 36.476   | 26.199   | 20.1          | WEJH                          |
| 25  | 41288  | 58.89    | 20.675   | 19.5          | MASIRAH                       |
| 26  | 41024  | 39.157   | 21.68    | 14.6          | KING ABDULAZIZ INTL           |
| 27  | 41256  | 58.284   | 23.593   | 14.6          | SEEB INTL                     |
| 28  | 41170  | 51.565   | 25.261   | 10.7          | DOHA INTL                     |
| 29  | 41194  | 55.364   | 25.255   | 10.4          | DUBAI INTL                    |
| 30  | 40439  | 38.063   | 24.144   | 7.9           | YENBO                         |
| 31  | 41140  | 42.586   | 16.901   | 6.1           | KING ABDULLAH BIN ABDULAZIZ   |
| 32  | 41246  | 56.65    | 24.467   | 2             | SOHAR MAJIS                   |
| 33  | 41150  | 50.634   | 26.271   | 1.8           | BAHRAIN INTL                  |

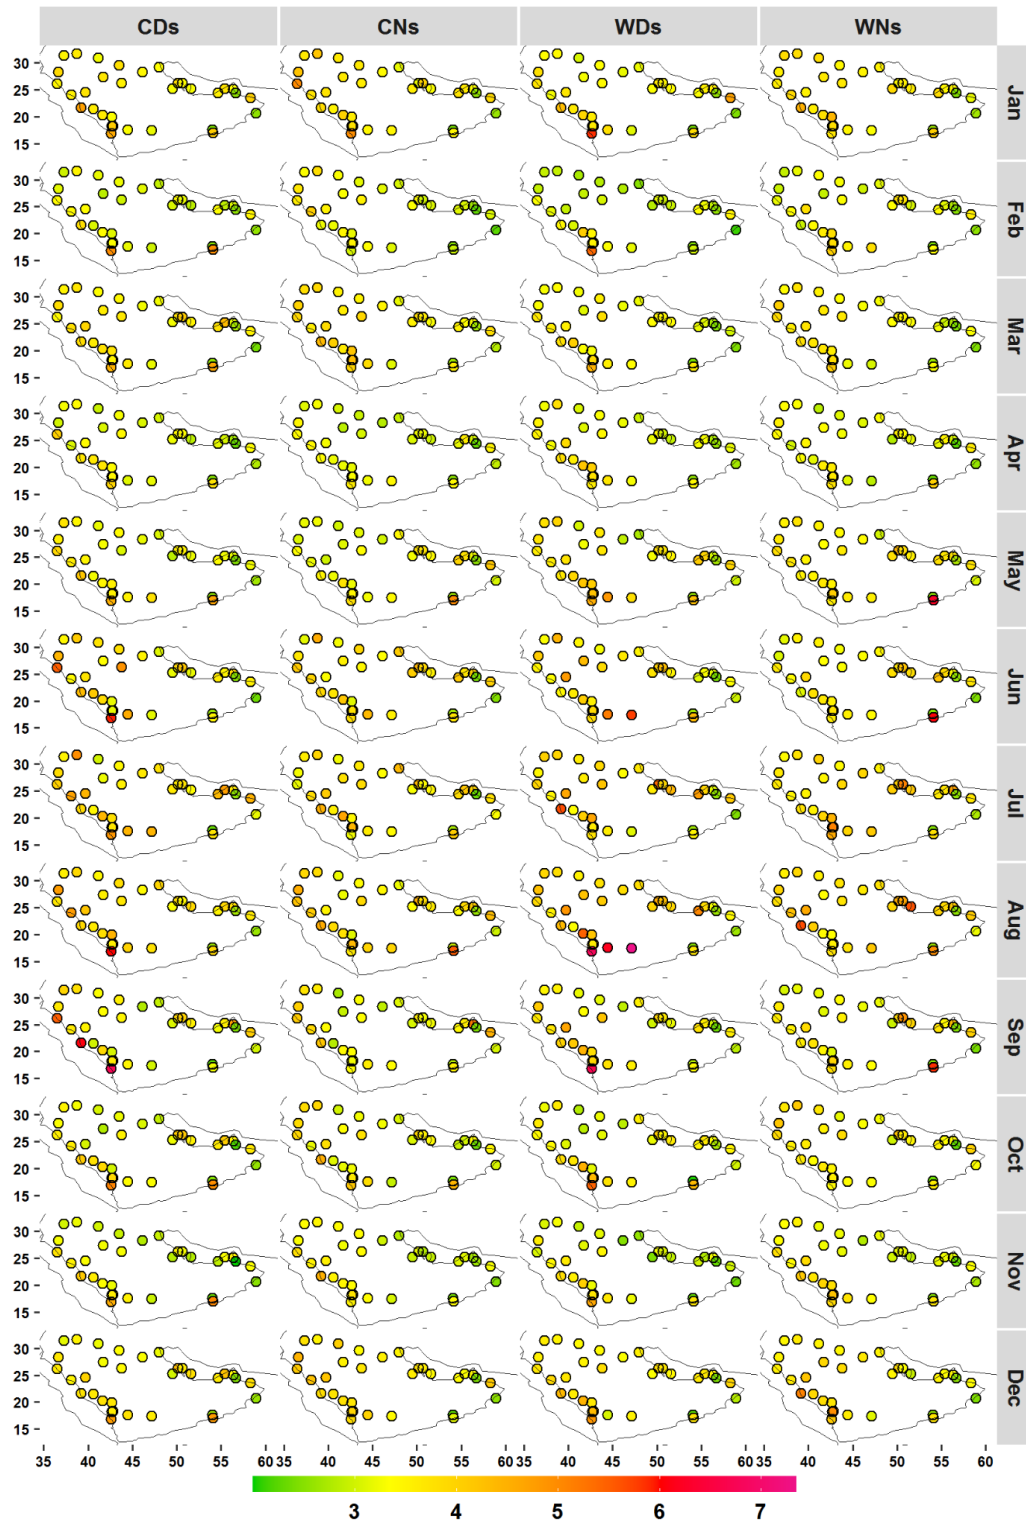

**Figure S1.** Mean frequency of cold days (CDs), cold nights (CNs), warm days (WDs), and warm nights (WNs) by month.

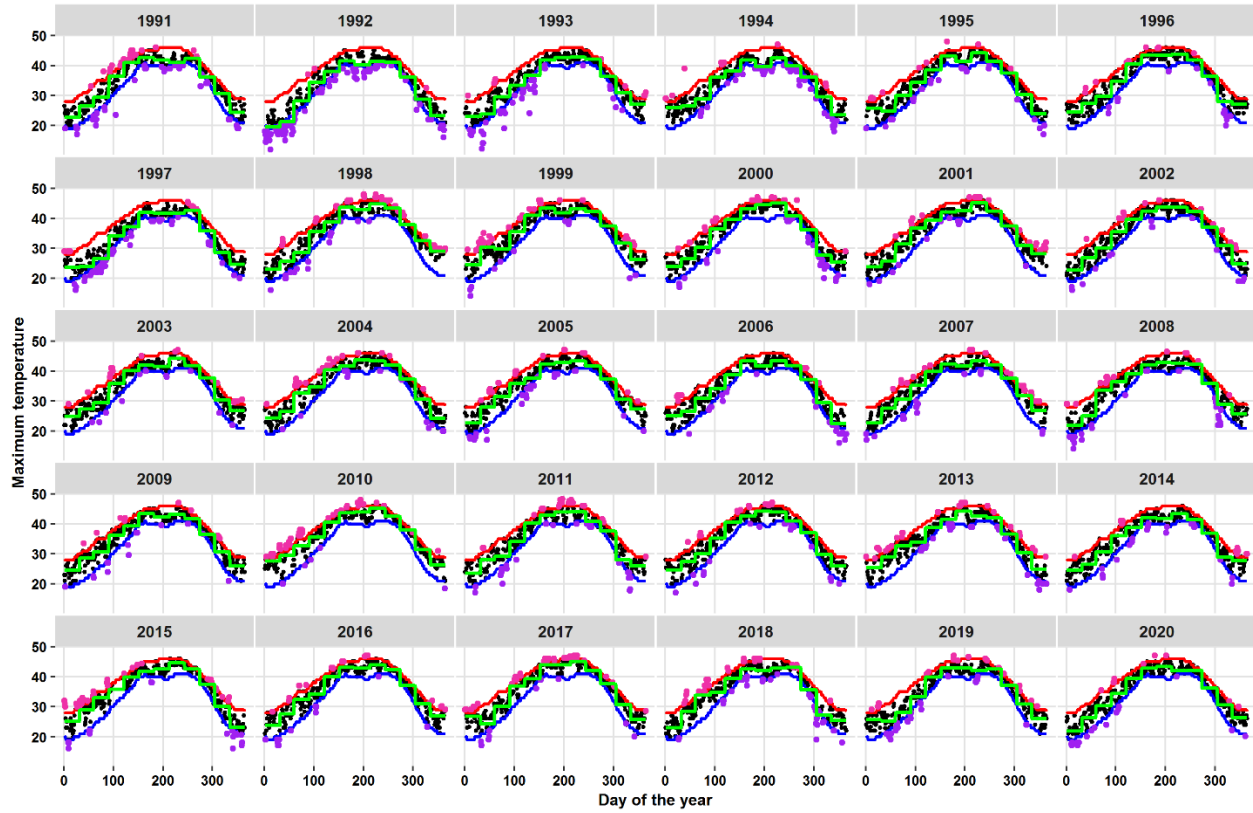

**Figure S2.** Annual cycles of daily maximum temperature [TX] (black points, °C) at station 40430 along with 90th (red line), 10th (blue line) percentiles, monthly mean TX (green line), detected WDs (red points), and CDs (purple points). Percentiles are estimated from the base period of 1991–2020 on a 15-day centered window.

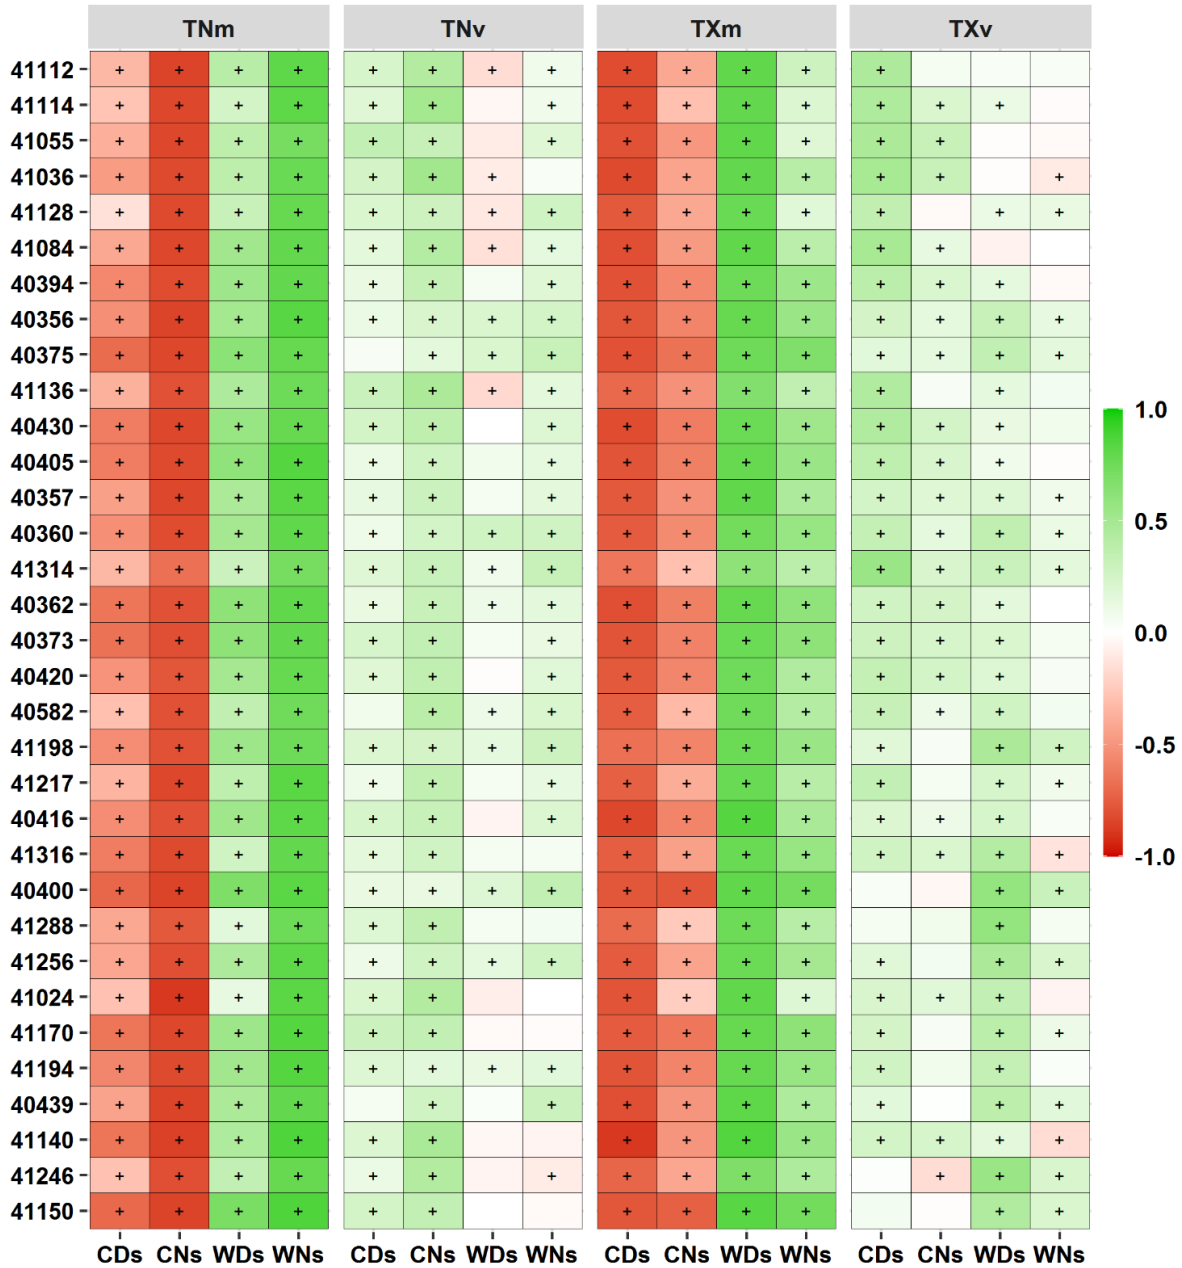

**Figure S3.** Correlation coefficients (Spearman's rank) between anomalies of mean/variance of TX (TXm/TXv) and TN (TNm/TNv), and frequency of different temperature extreme types. + is statistically significant at the 90% level. All anomalies were obtained with respect to the 1991 to 2020 monthly climatological average. Stations (y-axis) are ordered from high to low elevation.

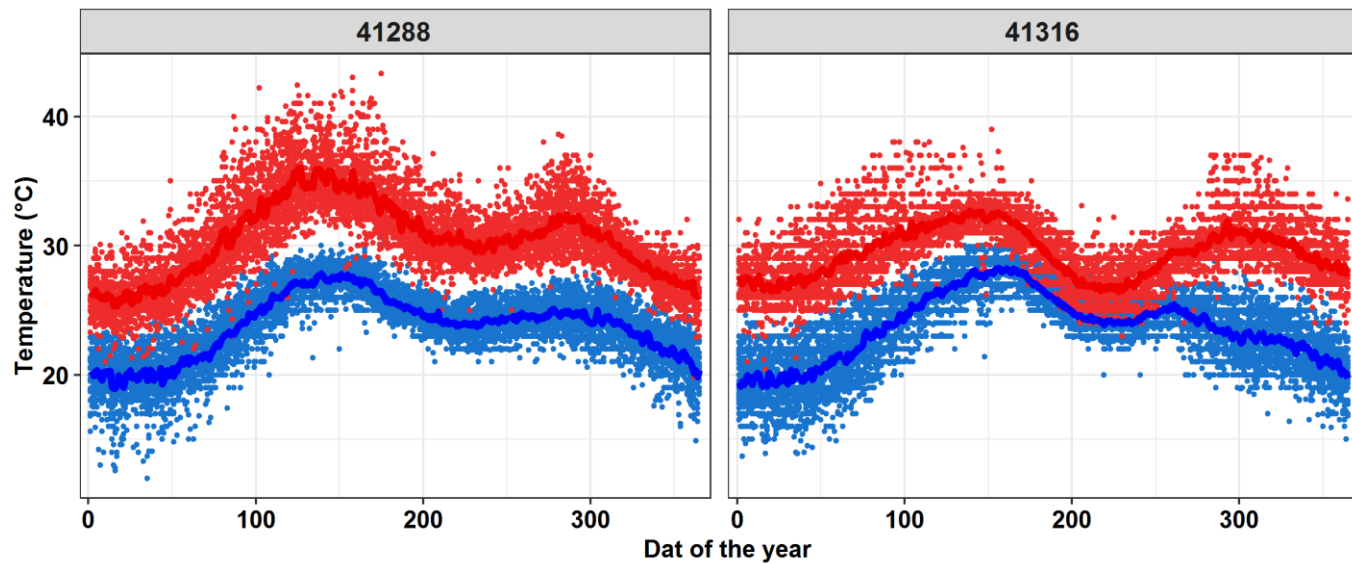

**Figure S4.** Annual cycles of maximum (red) and minimum (blue) temperatures (1991–2020) at stations 412888 and 41316.

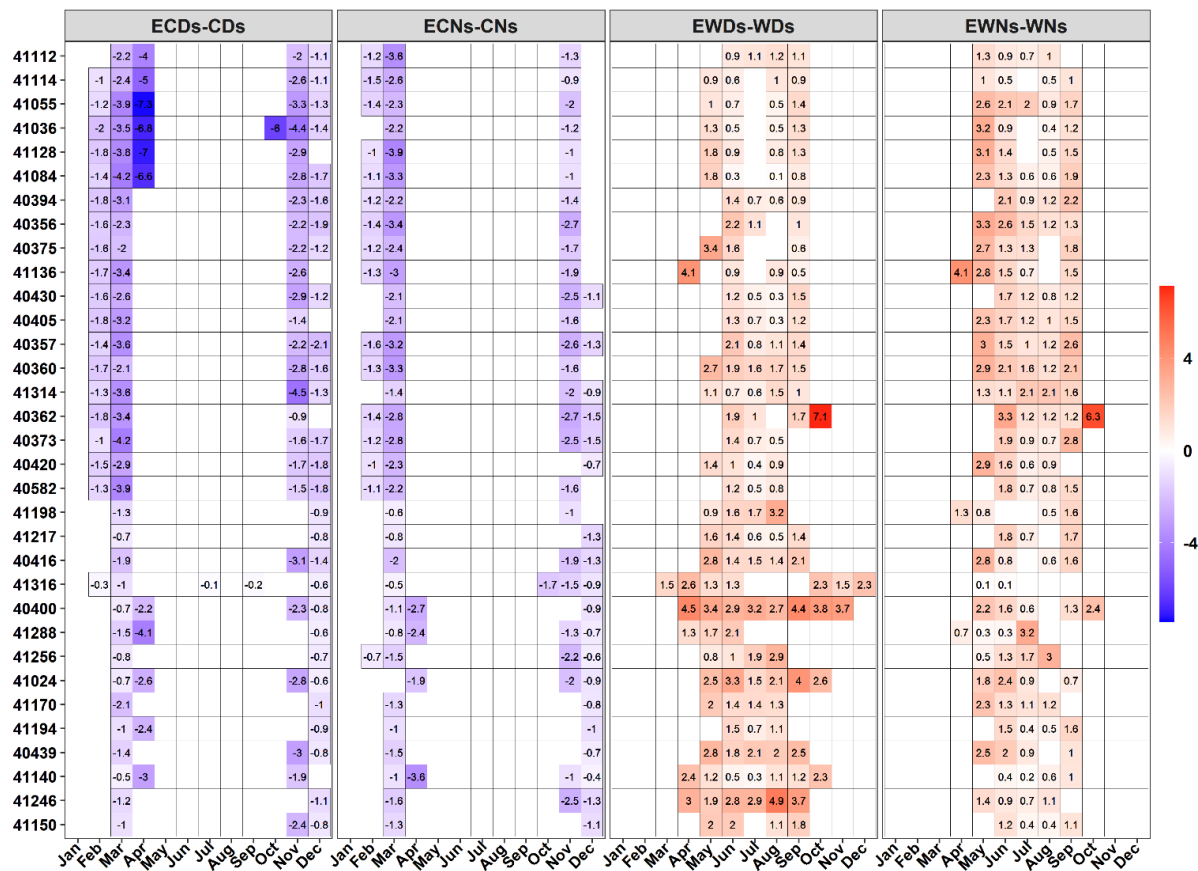

**Figure S5.** Differences between average relative intensities (°C) of extreme warm/cold days/nights [EWDs/ECDs, ECDs/ECNs] and warm/cold days/nights [WDs/CDs, WNs/CNs] by months. Stations (y-axis) are ordered from high to low elevation.



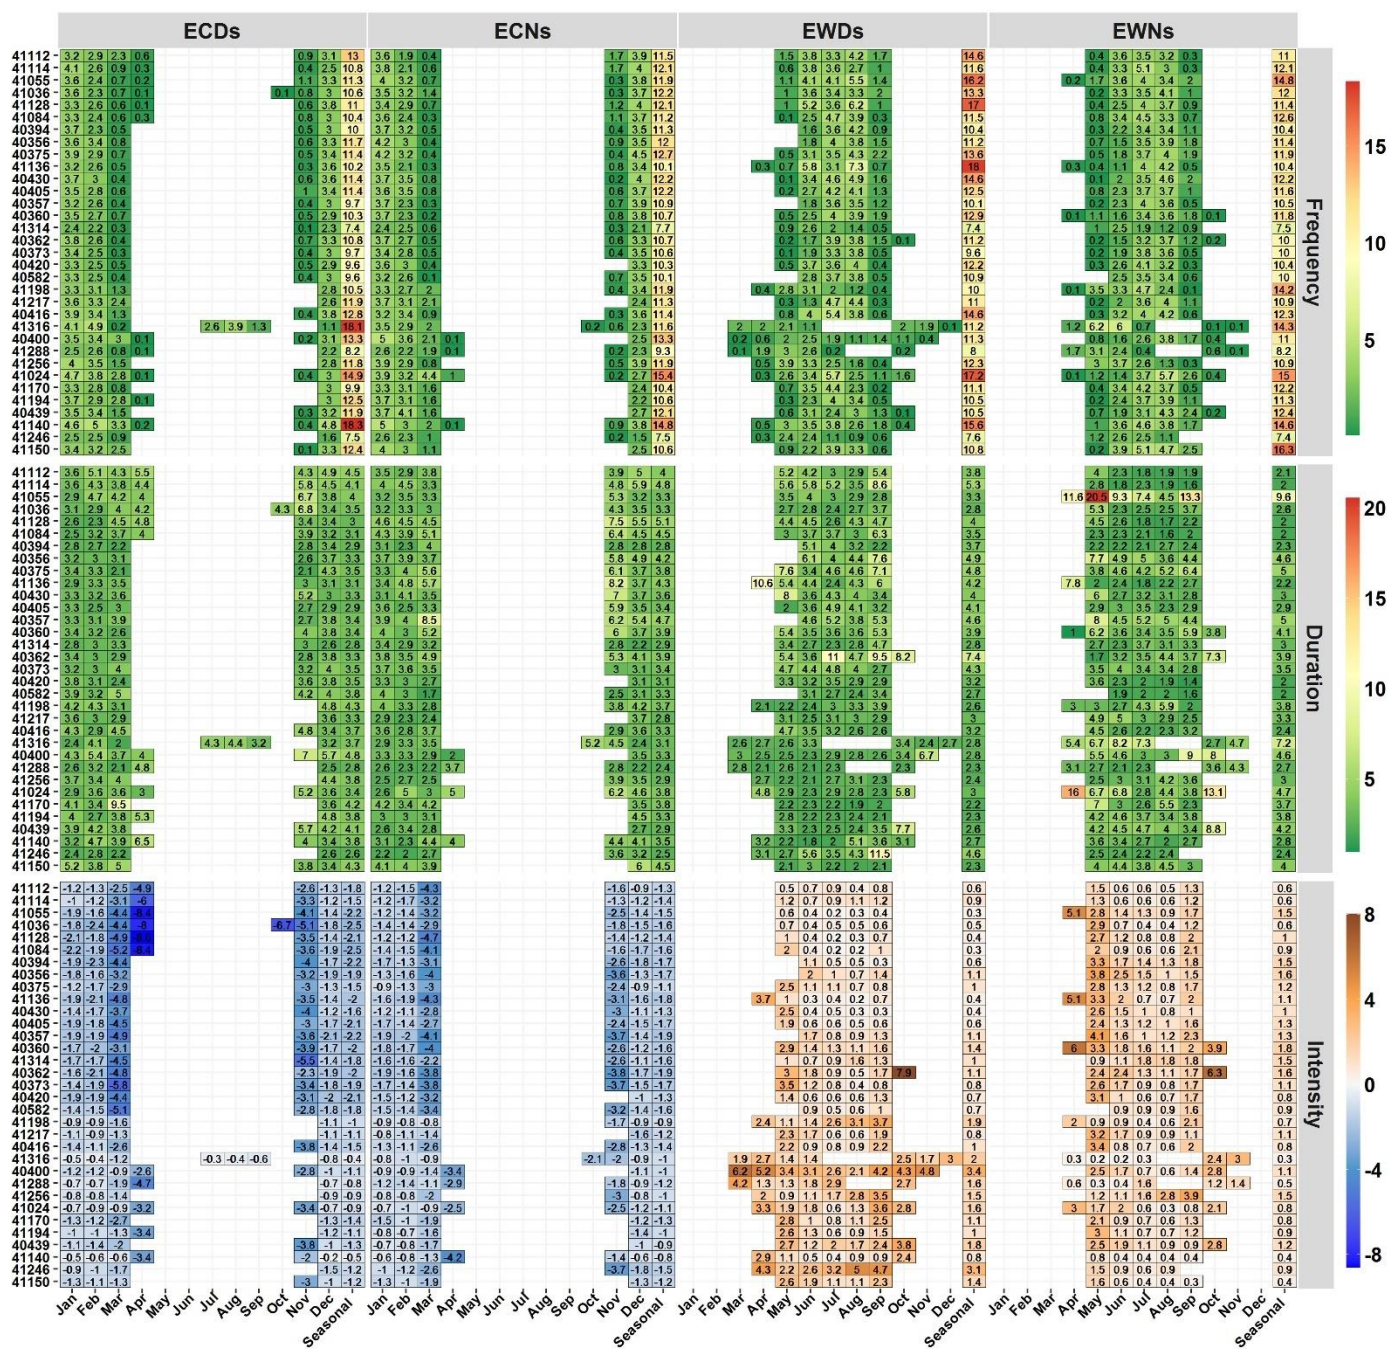

**Figure S6.** Monthly and seasonal means of frequency, intensity, and duration of extreme warm/cold days and nights along with the corresponding local seasonal averages. Stations (y-axis) are ordered from high to low elevation.

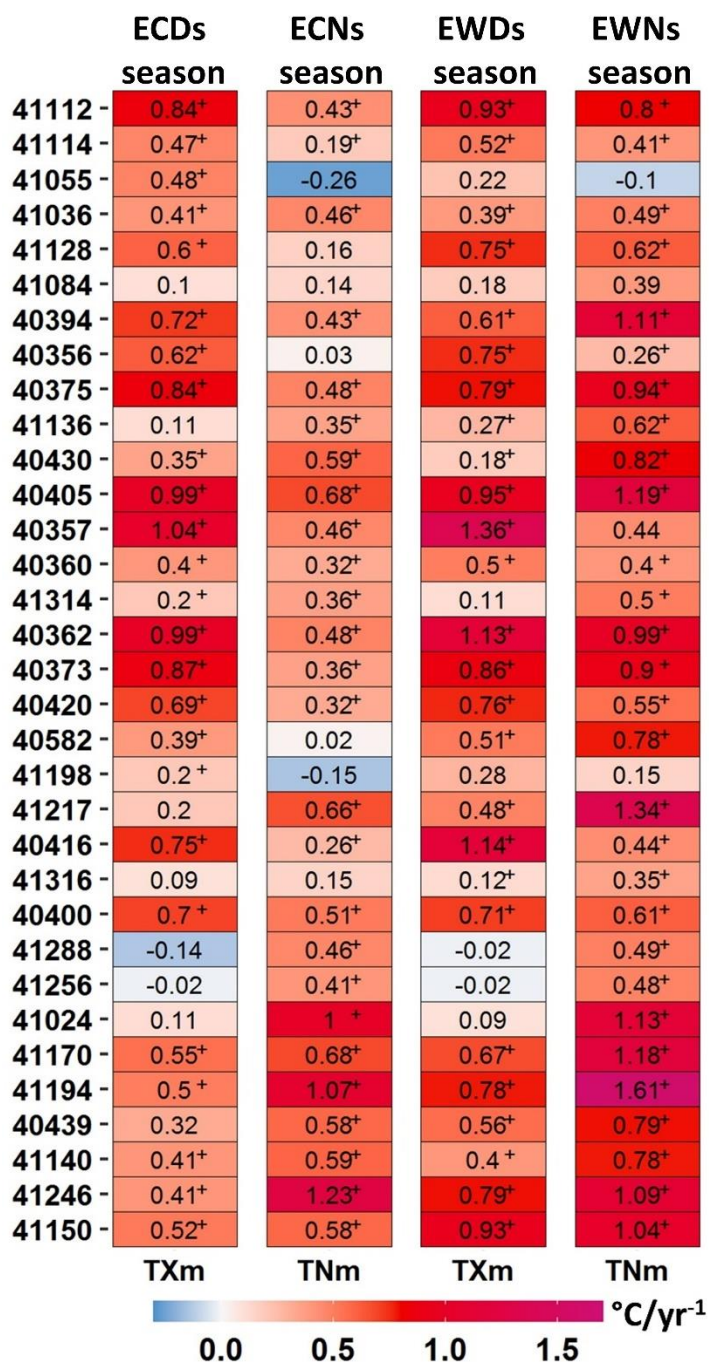

**Figure S7.** Absolute temporal decadal trends in mean daily maximum (TXm) and minimum (TNm) temperatures at local seasons of each ETEs. + is statistically significant at the 90% level. Stations (y-axis) are ordered from high to low elevation.



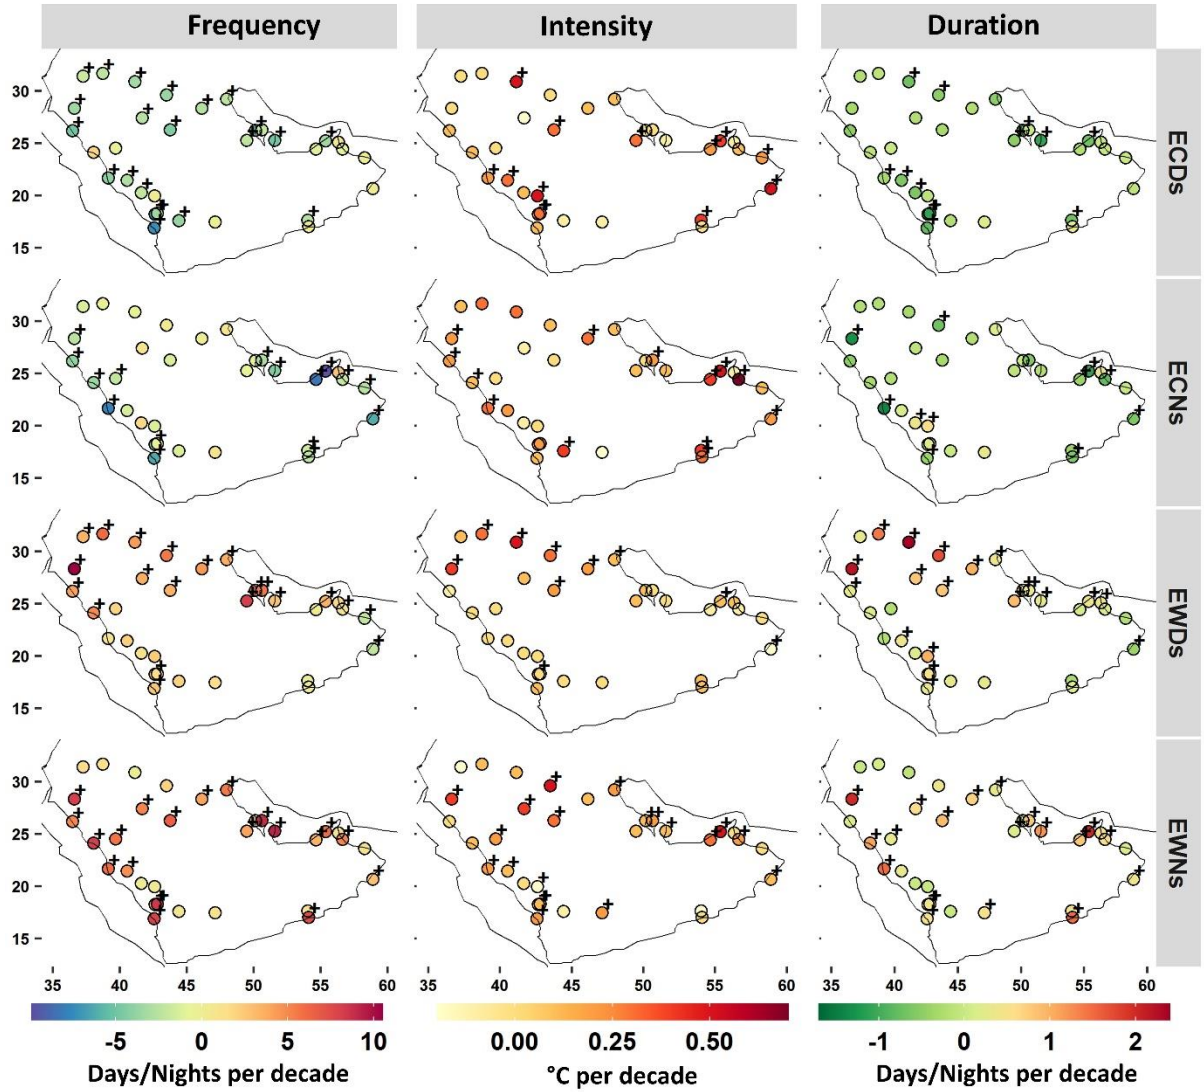

**Figure S8.** Absolute temporal decadal trends in frequency, duration, and intensity aspects of ETEs during local seasons. +  $\alpha = 0.10$  level of significance.
